# Supplementary material for: Exploring the association of the discharge medicines review with patient hospital readmissions through national routine data linkage in Wales: a retrospective cohort study
Source: PubMed Central journal article supplement — BMJ Open. 2020 Feb 9;10(2):e033551. doi: 10.1136/bmjopen-2019-033551 (PMC7045023; doi:10.1136/bmjopen-2019-033551), 2020-02-09
Supplement: bmjopen-2019-033551supp001.pdf [file bmjopen-2019-033551supp001.pdf]

**Supplementary Table 1:** Full process for data linkage using pseudonymised data across the national databases in this study

| Steps                                                            | Detailed process                                                                                                                                                                                                                                                                                                                                                                                                                                                                                                                                                                                                                                                                                                                                                                                                                                                                                                                                                                                                                                                                                                                                                                                                                                                                                                                                                                                                                                                                                                                                                                                                                                                                                                                                                                                                                                                                                                                                                                                                                                                                                                                                                                                                                                                                                                                                                                                                                                                                                                                                                                                                                                                                                                                                                                                                                                                                                                                                                                                                                                                                                                                                                                                        |
|------------------------------------------------------------------|---------------------------------------------------------------------------------------------------------------------------------------------------------------------------------------------------------------------------------------------------------------------------------------------------------------------------------------------------------------------------------------------------------------------------------------------------------------------------------------------------------------------------------------------------------------------------------------------------------------------------------------------------------------------------------------------------------------------------------------------------------------------------------------------------------------------------------------------------------------------------------------------------------------------------------------------------------------------------------------------------------------------------------------------------------------------------------------------------------------------------------------------------------------------------------------------------------------------------------------------------------------------------------------------------------------------------------------------------------------------------------------------------------------------------------------------------------------------------------------------------------------------------------------------------------------------------------------------------------------------------------------------------------------------------------------------------------------------------------------------------------------------------------------------------------------------------------------------------------------------------------------------------------------------------------------------------------------------------------------------------------------------------------------------------------------------------------------------------------------------------------------------------------------------------------------------------------------------------------------------------------------------------------------------------------------------------------------------------------------------------------------------------------------------------------------------------------------------------------------------------------------------------------------------------------------------------------------------------------------------------------------------------------------------------------------------------------------------------------------------------------------------------------------------------------------------------------------------------------------------------------------------------------------------------------------------------------------------------------------------------------------------------------------------------------------------------------------------------------------------------------------------------------------------------------------------------------|
| <b>Step 1 –<br/>Extracting data<br/>for<br/>pseudonymisation</b> | <p data-bbox="483 323 1946 379">A team of information specialists within NHS Wales Informatics Service (NWIS) retrieves data using three sets of queries, to produce 3 tables, as described below.</p> <ul style="list-style-type: none"> <li data-bbox="483 392 1061 416">• <b>Data from National Data Resource (NDR) system:</b> <ul style="list-style-type: none"> <li data-bbox="568 424 1765 448">○ Date and time whereby the Electronic NHS Alert Service (ENAS) email was sent to the community pharmacy</li> <li data-bbox="568 456 1615 480">○ A unique identifier for the Discharge Advice Letter (DAL) document used by the NDR database</li> <li data-bbox="568 488 1211 512">○ The email address where the ENAS notification was sent</li> <li data-bbox="568 520 1464 544">○ Success or failure status of the community pharmacy picking up the notification</li> </ul> </li> <li data-bbox="483 552 786 576">• <b>Information in the DAL:</b> <ul style="list-style-type: none"> <li data-bbox="568 584 1368 608">○ The unique identifier for the DAL document used by the NDR database</li> <li data-bbox="568 616 1599 639">○ The primary key for the Document Notification Table (PK). An integer assigned sequentially.</li> <li data-bbox="568 647 1061 671">○ 10-digit identifier for an individual patient</li> <li data-bbox="568 679 1946 735">○ The date and time that the DAL is posted to the <i>Choose Pharmacy</i> database and hence available to the community pharmacist within the <i>Choose Pharmacy</i> application</li> <li data-bbox="568 743 1823 767">○ The date and time that the DAL is opened by the community pharmacist within the <i>Choose Pharmacy</i> application</li> <li data-bbox="568 775 1234 799">○ The type of document made available (currently only DAL)</li> </ul> </li> <li data-bbox="483 807 891 831">• <b>Information in <i>Choose Pharmacy</i>:</b> <ul style="list-style-type: none"> <li data-bbox="568 839 1111 863">○ The ID of the DAL used in the consultation (FK)</li> <li data-bbox="568 871 1727 895">○ The primary key for the Discharge Medicines Review (DMR) table (PK). An integer assigned sequentially.</li> <li data-bbox="568 903 1525 927">○ Boolean Flag to denote whether the consultation has been completed and submitted</li> <li data-bbox="568 935 1256 959">○ Boolean Flag to denote whether DMR Part 2 was completed</li> <li data-bbox="568 967 1429 991">○ If DMR Part 2 was not completed, selection of reason from a drop-down box</li> <li data-bbox="568 999 1727 1023">○ The date the patient was discharged from hospital, as recorded within the <i>Choose Pharmacy</i> application</li> <li data-bbox="568 1031 1525 1054">○ Date and time the DMR consultation was started within <i>Choose Pharmacy</i> application</li> <li data-bbox="568 1062 1032 1086">○ Date and time that part 1 was recorded</li> <li data-bbox="568 1094 1032 1118">○ Date and time that part 2 was recorded</li> </ul> </li> </ul> <p data-bbox="483 1169 1946 1193">A final table combines the tables above to create one dataset, edited to include only the relevant data and then sent for pseudonymization.</p> |

---

**Step 2 – Pseudonymising patient specific pharmacy data**

The audit table, containing the patient’s NHS number, is sent through the NWIS pseudonymisation service. This service applies a 64-bit blowfish encryption algorithm to the NHS number, and then this value is mapped to a more readable integer format (Pseudonymised ID). This Pseudonymised ID field is common to all other datasets within NWIS’ data warehouse, meaning that records can easily be linked at the level of the individual.

---

**Step 3 – Linking of pseudonymised pharmacy data to hospital data**

Admissions for each indicated patient were joined together from the specially pseudonymised dataset and Patient Episode Database for Wales (PEDW) using Structured Query Language (SQL), a language which is used to build, navigate and manipulate databases. Using the pseudonymised common identifier within both datasets, the pseudonymised identifiable data which related to those patients who had a referral to the DMR service (detailed in Table 2) was linked with records of admissions within hospital. This created a database with several rows for each patient, which showed all of the DMR information and all the admissions information for each patient (detailing a portion of information about each admission and providing information about the demographics of the patient at that time).

Assuming that the admission which prompted a DMR must be that which immediately preceded the ENAS notification into the Choose Pharmacy system, readmission was determined by checking the linked dataset for any subsequent admission. This was done using the coding language for excel - Visual Basic for Applications - to create a Macro. Macros are used to automate tasks in excel which work by following inputted rules.

The pseudonymised dataset made up of DMR service patients was edited to include columns for information on the admission prior to DMR referral and information on the first subsequent admission (if one occurred). The Macro that was used checked the date of the ENAS and filled in details of the initial admission by looking at the linked dataset and recording the admission immediately before this date. It also looked at any admissions immediately after this date (readmission) and noted them down. In this way, a new dataset for analysis was constructed which contained pseudonymised patient information at their initial admission, patient DMR service information and patient information from their first admission occurring after referral to the DMR service (if applicable).

---
