# Supplementary material for: Exploring the association of the discharge medicines review with patient hospital readmissions through national routine data linkage in Wales: a retrospective cohort study
Source: PubMed Central journal article supplement — BMJ Open. 2020 Feb 9;10(2):e033551. doi: 10.1136/bmjopen-2019-033551 (PMC7045023; doi:10.1136/bmjopen-2019-033551), 2020-02-09
Supplement: bmjopen-2019-033551supp002.pdf [file bmjopen-2019-033551supp002.pdf]

**Supplementary Table 2:** STROBE Statement—Checklist of items that should be included in reports of cohort studies

|                              | Item No | Recommendation                                                                                                                                                                       | Page No. |
|------------------------------|---------|--------------------------------------------------------------------------------------------------------------------------------------------------------------------------------------|----------|
| Title and abstract           | 1       | (a) Indicate the study’s design with a commonly used term in the title or the abstract                                                                                               | 1-2      |
|                              |         | (b) Provide in the abstract an informative and balanced summary of what was done and what was found                                                                                  | 2        |
| Introduction                 |         |                                                                                                                                                                                      |          |
| Background/rationale         | 2       | Explain the scientific background and rationale for the investigation being reported                                                                                                 | 3-4      |
| Objectives                   | 3       | State specific objectives, including any prespecified hypotheses                                                                                                                     | 4        |
| Methods                      |         |                                                                                                                                                                                      |          |
| Study design                 | 4       | Present key elements of study design early in the paper                                                                                                                              | 5-7      |
| Setting                      | 5       | Describe the setting, locations, and relevant dates, including periods of recruitment, exposure, follow-up, and data collection                                                      | 4-7      |
| Participants                 | 6       | (a) Give the eligibility criteria, and the sources and methods of selection of participants. Describe methods of follow-up                                                           | 5-7      |
|                              |         | (b) For matched studies, give matching criteria and number of exposed and unexposed                                                                                                  | NA - 5   |
| Variables                    | 7       | Clearly define all outcomes, exposures, predictors, potential confounders, and effect modifiers. Give diagnostic criteria, if applicable                                             | 4 and 7  |
| Data sources/<br>measurement | 8       | For each variable of interest, give sources of data and details of methods of assessment (measurement). Describe comparability of assessment methods if there is more than one group | 5-7      |
| Bias                         | 9       | Describe any efforts to address potential sources of bias                                                                                                                            | 7        |
| Study size                   | 10      | Explain how the study size was arrived at                                                                                                                                            | 5        |
| Quantitative variables       | 11      | Explain how quantitative variables were handled in the analyses. If applicable, describe which groupings were chosen and why                                                         | 7        |
| Statistical methods          | 12      | (a) Describe all statistical methods, including those used to control for confounding                                                                                                | 7        |

|                   |    |                                                                                                                                                                                                              |                            |
|-------------------|----|--------------------------------------------------------------------------------------------------------------------------------------------------------------------------------------------------------------|----------------------------|
|                   |    | (b) Describe any methods used to examine subgroups and interactions                                                                                                                                          | 7                          |
|                   |    | (c) Explain how missing data were addressed                                                                                                                                                                  | 6-7                        |
|                   |    | (d) If applicable, explain how loss to follow-up was addressed                                                                                                                                               | 6-7                        |
|                   |    | (e) Describe any sensitivity analyses                                                                                                                                                                        | NA                         |
| <b>Results</b>    |    |                                                                                                                                                                                                              |                            |
| Participants      | 13 | (a) Report numbers of individuals at each stage of study—eg numbers potentially eligible, examined for eligibility, confirmed eligible, included in the study, completing follow-up, and analysed            | 7-8                        |
|                   |    | (b) Give reasons for non-participation at each stage                                                                                                                                                         | NA                         |
|                   |    | (c) Consider use of a flow diagram                                                                                                                                                                           | Not included               |
| Descriptive data  | 14 | (a) Give characteristics of study participants (eg demographic, clinical, social) and information on exposures and potential confounders                                                                     | 8 and supplementary file   |
|                   |    | (b) Indicate number of participants with missing data for each variable of interest                                                                                                                          | 7                          |
|                   |    | (c) Summarise follow-up time (eg, average and total amount)                                                                                                                                                  | 7                          |
| Outcome data      | 15 | Report numbers of outcome events or summary measures over time                                                                                                                                               | 7-9                        |
| Main results      | 16 | (a) Give unadjusted estimates and, if applicable, confounder-adjusted estimates and their precision (eg, 95% confidence interval). Make clear which confounders were adjusted for and why they were included | 8-9 and supplementary file |
|                   |    | (b) Report category boundaries when continuous variables were categorized                                                                                                                                    | Supplementary file         |
|                   |    | (c) If relevant, consider translating estimates of relative risk into absolute risk for a meaningful time period                                                                                             | NA                         |
| Other analyses    | 17 | Report other analyses done—eg analyses of subgroups and interactions, and sensitivity analyses                                                                                                               | 7-9                        |
| <b>Discussion</b> |    |                                                                                                                                                                                                              |                            |

|                          |    |                                                                                                                                                                            |       |
|--------------------------|----|----------------------------------------------------------------------------------------------------------------------------------------------------------------------------|-------|
| Key results              | 18 | Summarise key results with reference to study objectives                                                                                                                   | 9     |
| Limitations              | 19 | Discuss limitations of the study, taking into account sources of potential bias or imprecision. Discuss both direction and magnitude of any potential bias                 | 10-11 |
| Interpretation           | 20 | Give a cautious overall interpretation of results considering objectives, limitations, multiplicity of analyses, results from similar studies, and other relevant evidence | 9-10  |
| Generalisability         | 21 | Discuss the generalisability (external validity) of the study results                                                                                                      | 9-11  |
| <b>Other information</b> |    |                                                                                                                                                                            |       |
| Funding                  | 22 | Give the source of funding and the role of the funders for the present study and, if applicable, for the original study on which the present article is based              | 11    |
