# Supplementary material for: Exploring the association of the discharge medicines review with patient hospital readmissions through national routine data linkage in Wales: a retrospective cohort study
Source: PubMed Central journal article supplement — BMJ Open. 2020 Feb 9;10(2):e033551. doi: 10.1136/bmjopen-2019-033551 (PMC7045023; doi:10.1136/bmjopen-2019-033551), 2020-02-09
Supplement: bmjopen-2019-033551supp003.pdf [file bmjopen-2019-033551supp003.pdf]

**Supplementary Table 3:** Characteristics of the baseline population of the study (n=1923), split into groups in relation to whether they had received discharge medicines review service (DMR) Part 1 upon discharge from hospital

|                                                          |                | <b>DMR started</b> | <b>No DMR</b>      |
|----------------------------------------------------------|----------------|--------------------|--------------------|
| <b>Age</b>                                               | Mean (3sf)     | 75.1               | 73.9               |
|                                                          | IQR            | 17 (Q1=68, Q3=85)  | 16 (Q1=68, Q3= 84) |
| <b>Sex</b>                                               | Female         | 338                | 615                |
|                                                          | Male           | 350                | 620                |
| <b>Deprivation quintile</b>                              | 1              | 228                | 396                |
|                                                          | 2              | 257                | 350                |
|                                                          | 3              | 105                | 217                |
|                                                          | 4              | 65                 | 176                |
|                                                          | 5              | 33                 | 95                 |
| <b>Original admission diagnosis (top 5 BNF chapters)</b> | Respiratory    | 133                | 265                |
|                                                          | Circulatory    | 110                | 157                |
|                                                          | Genito-urinary | 52                 | 122                |
|                                                          | Poisoning      | 61                 | 96                 |
|                                                          | Digestive      | 57                 | 88                 |
|                                                          | Unclassified   | 98                 | 173                |
| <b>Death rate</b>                                        |                | 15 / 688 (2%)      | 64 / 1235 (5%)     |
