# Supplementary material for: Exploring the association of the discharge medicines review with patient hospital readmissions through national routine data linkage in Wales: a retrospective cohort study
Source: PubMed Central journal article supplement — BMJ Open. 2020 Feb 9;10(2):e033551. doi: 10.1136/bmjopen-2019-033551 (PMC7045023; doi:10.1136/bmjopen-2019-033551), 2020-02-09
Supplement: bmjopen-2019-033551supp004.pdf [file bmjopen-2019-033551supp004.pdf]

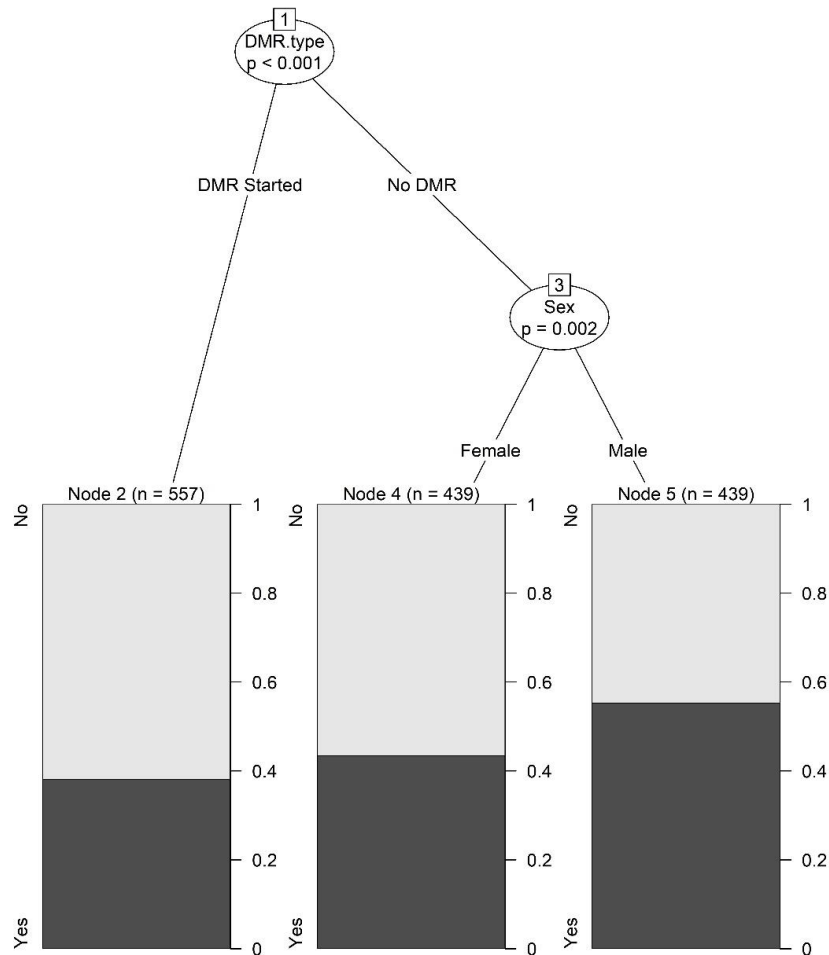

**Supplementary Figure 1:** The conditional inference tree (CTree) that was used to identify the variable with the strongest association to readmission within 90 days, using age decile, sex, deprivation decile, diagnostic grouping and DMR type (started or not started) as the possible criteria for classification.
