# Supplementary material for: Exploring the association of the discharge medicines review with patient hospital readmissions through national routine data linkage in Wales: a retrospective cohort study
Source: PubMed Central journal article supplement — BMJ Open. 2020 Feb 9;10(2):e033551. doi: 10.1136/bmjopen-2019-033551 (PMC7045023; doi:10.1136/bmjopen-2019-033551), 2020-02-09
Supplement: bmjopen-2019-033551supp005.pdf [file bmjopen-2019-033551supp005.pdf]

**Supplementary Table 4:** Coefficients and p-values from the time stratified Cox's survival analysis used with a stratification of the DMR variable at 40 days, identified by plotting DMR using the Aalen model. The only variable triggering the significance tests is the stratified DMR variable from 0 to 40 days. Diagnoses were categorised based on BNF chapters. Significance codes: 0 '\*\*\*' 0.001 '\*\*' 0.01 '\*' 0.05 '.' 0.1 '.' 1.

|                                                                                                                    | coef     | exp(coef) | se(coef) | z      | Pr(> z ) |
|--------------------------------------------------------------------------------------------------------------------|----------|-----------|----------|--------|----------|
| SexMale                                                                                                            | 0.08574  | 1.08952   | 0.04812  | 1.782  | 0.0748   |
| Quintile1                                                                                                          | 0.75671  | 2.13124   | 1.05655  | 0.716  | 0.4739   |
| Quintile2                                                                                                          | 0.69989  | 2.01353   | 1.05701  | 0.662  | 0.5079   |
| Quintile3                                                                                                          | 0.68254  | 1.9789    | 1.05552  | 0.647  | 0.5179   |
| Quintile4                                                                                                          | 0.66517  | 1.94482   | 1.05795  | 0.629  | 0.5295   |
| Quintile5                                                                                                          | 0.60378  | 1.82903   | 1.06008  | 0.57   | 0.569    |
| AgeDecile100-109                                                                                                   | 0.2797   | 1.32273   | 0.52982  | 0.528  | 0.5976   |
| AgeDecile20-29                                                                                                     | 0.08408  | 1.08772   | 0.47895  | 0.176  | 0.8606   |
| AgeDecile30-39                                                                                                     | 0.0375   | 1.03821   | 0.46302  | 0.081  | 0.9355   |
| AgeDecile40-49                                                                                                     | 0.01306  | 1.01314   | 0.44552  | 0.029  | 0.9766   |
| AgeDecile50-59                                                                                                     | 0.15763  | 1.17073   | 0.4324   | 0.365  | 0.7155   |
| AgeDecile60-69                                                                                                     | 0.1062   | 1.11205   | 0.42818  | 0.248  | 0.8041   |
| AgeDecile70-79                                                                                                     | 0.24576  | 1.27859   | 0.42634  | 0.576  | 0.5643   |
| AgeDecile80-89                                                                                                     | 0.23562  | 1.26569   | 0.42571  | 0.553  | 0.5799   |
| AgeDecile90-99                                                                                                     | 0.1118   | 1.11829   | 0.43128  | 0.259  | 0.7955   |
| BNFChapter 01: Certain infectious and parasitic diseases                                                           | -0.04902 | 0.95216   | 0.20632  | -0.238 | 0.8122   |
| BNFChapter 02: Neoplasms                                                                                           | 0.31521  | 1.37054   | 0.22788  | 1.383  | 0.1666   |
| BNFChapter 03: Diseases of the blood and blood forming organs and certain disorders involving the immune mechanism | 0.12141  | 1.12909   | 0.27557  | 0.441  | 0.6595   |
| BNFChapter 04: Endocrine, nutritional and metabolic diseases                                                       | 0.09815  | 1.10313   | 0.21346  | 0.46   | 0.6457   |
| BNFChapter 05: Mental and behavioural disorders                                                                    | 0.12945  | 1.1382    | 0.24055  | 0.538  | 0.5905   |
| BNFChapter 06: Diseases of the nervous system                                                                      | 0.07728  | 1.08034   | 0.23179  | 0.333  | 0.7388   |
| BNFChapter 07: Diseases of the eye and adnexa                                                                      | -0.0308  | 0.96967   | 0.5384   | -0.057 | 0.9544   |
| BNFChapter 08: Diseases of the ear and mastoid process                                                             | 0.35829  | 1.43089   | 0.60549  | 0.592  | 0.554    |
| BNFChapter 09: Diseases of the circulatory system                                                                  | -0.03928 | 0.96148   | 0.18409  | -0.213 | 0.831    |

|                                                                                                        |          |         |         |        |          |     |
|--------------------------------------------------------------------------------------------------------|----------|---------|---------|--------|----------|-----|
| BNFChapter 10: Diseases of the respiratory system                                                      | 0.18104  | 1.19846 | 0.1808  | 1.001  | 0.3167   |     |
| BNFChapter 11: Diseases of the digestive system                                                        | 0.01954  | 1.01973 | 0.19288 | 0.101  | 0.9193   |     |
| BNFChapter 12: Diseases of the skin and subcutaneous tissue                                            | 0.01734  | 1.01749 | 0.22209 | 0.078  | 0.9378   |     |
| BNFChapter 13: Diseases of the musculoskeletal system/connective system                                | -0.24174 | 0.78526 | 0.2066  | -1.17  | 0.242    |     |
| BNFChapter 14: Diseases of the genitourinary system                                                    | 0.07846  | 1.08162 | 0.19025 | 0.412  | 0.6801   |     |
| BNFChapter 15: Pregnancy, childbirth and the puerperium                                                | 1.79629  | 6.02727 | 1.03446 | 1.736  | 0.0825   | .   |
| BNFChapter 17: Congenital malformations, deformations and chromosomal abnormalities                    | 1.18017  | 3.25492 | 0.6058  | 1.948  | 0.0514   | .   |
| BNFChapter 18: Symptoms, signs and abnormal clinical and laboratory findings, not elsewhere classified | -0.0463  | 0.95475 | 0.18408 | -0.252 | 0.8014   |     |
| BNFChapter 19: Injury/poisoning/other consequences of external causes                                  | -0.06103 | 0.9408  | 0.19108 | -0.319 | 0.7494   |     |
| BNFChapter 21: Factors influencing health and contact with health services                             | 0.23646  | 1.26675 | 0.37172 | 0.636  | 0.5247   |     |
| DMRDMR Started:strata(tgroup)tgroup=1                                                                  | -0.51519 | 0.59739 | 0.08642 | -5.962 | 2.50E-09 | *** |
| DMRNo DMR:strata(tgroup)tgroup=1                                                                       | NA       | NA      | 0       | NA     | NA       |     |
| DMRDMR Started:strata(tgroup)tgroup=2                                                                  | -0.03336 | 0.96719 | 0.06041 | -0.552 | 0.5808   |     |
| DMRNo DMR:strata(tgroup)tgroup=2                                                                       | NA       | NA      | 0       | NA     | NA       |     |
