# Supplementary material for: Exploring the association of the discharge medicines review with patient hospital readmissions through national routine data linkage in Wales: a retrospective cohort study
Source: PubMed Central journal article supplement — BMJ Open. 2020 Feb 9;10(2):e033551. doi: 10.1136/bmjopen-2019-033551 (PMC7045023; doi:10.1136/bmjopen-2019-033551), 2020-02-09
Supplement: bmjopen-2019-033551supp006.pdf [file bmjopen-2019-033551supp006.pdf]

**Supplementary Table 5:** Coefficients and confidence intervals from the time stratified Cox's survival analysis for variables other than the stratified DMR. No other significant associations are identified, with hazard ratios that do not show any consistent effect from any of the other variables. Diagnoses were categorised based on BNF chapters.

| ---                                                                                                                | exp(coef) | exp(-coef) | lower .95 | upper .95 |
|--------------------------------------------------------------------------------------------------------------------|-----------|------------|-----------|-----------|
| SexMale                                                                                                            | 1.0895    | 0.9178     | 0.9915    | 1.1973    |
| Quintile1                                                                                                          | 2.1312    | 0.4692     | 0.2687    | 16.9033   |
| Quintile2                                                                                                          | 2.0135    | 0.4966     | 0.2536    | 15.9839   |
| Quintile3                                                                                                          | 1.9789    | 0.5053     | 0.25      | 15.6632   |
| Quintile4                                                                                                          | 1.9448    | 0.5142     | 0.2445    | 15.467    |
| Quintile5                                                                                                          | 1.829     | 0.5467     | 0.229     | 14.6069   |
| AgeDecile100-109                                                                                                   | 1.3227    | 0.756      | 0.4683    | 3.7364    |
| AgeDecile20-29                                                                                                     | 1.0877    | 0.9194     | 0.4254    | 2.781     |
| AgeDecile30-39                                                                                                     | 1.0382    | 0.9632     | 0.4189    | 2.5728    |
| AgeDecile40-49                                                                                                     | 1.0131    | 0.987      | 0.4231    | 2.4261    |
| AgeDecile50-59                                                                                                     | 1.1707    | 0.8542     | 0.5016    | 2.7322    |
| AgeDecile60-69                                                                                                     | 1.112     | 0.8992     | 0.4805    | 2.5739    |
| AgeDecile70-79                                                                                                     | 1.2786    | 0.7821     | 0.5544    | 2.9487    |
| AgeDecile80-89                                                                                                     | 1.2657    | 0.7901     | 0.5495    | 2.9154    |
| AgeDecile90-99                                                                                                     | 1.1183    | 0.8942     | 0.4802    | 2.6041    |
| BNFChapter 01: Certain infectious and parasitic diseases                                                           | 0.9522    | 1.0502     | 0.6355    | 1.4267    |
| BNFChapter 02: Neoplasms                                                                                           | 1.3705    | 0.7296     | 0.8768    | 2.1422    |
| BNFChapter 03: Diseases of the blood and blood forming organs and certain disorders involving the immune mechanism | 1.1291    | 0.8857     | 0.6579    | 1.9377    |
| BNFChapter 04: Endocrine, nutritional and metabolic diseases                                                       | 1.1031    | 0.9065     | 0.726     | 1.6762    |
| BNFChapter 05: Mental and behavioural disorders                                                                    | 1.1382    | 0.8786     | 0.7103    | 1.8238    |
| BNFChapter 06: Diseases of the nervous system                                                                      | 1.0803    | 0.9256     | 0.6859    | 1.7016    |
| BNFChapter 07: Diseases of the eye and adnexa                                                                      | 0.9697    | 1.0313     | 0.3376    | 2.7855    |
| BNFChapter 08: Diseases of the ear and mastoid process                                                             | 1.4309    | 0.6989     | 0.4367    | 4.6882    |
| BNFChapter 09: Diseases of the circulatory system                                                                  | 0.9615    | 1.0401     | 0.6703    | 1.3792    |

|                                                                                                        |        |        |        |         |
|--------------------------------------------------------------------------------------------------------|--------|--------|--------|---------|
| BNFChapter 10: Diseases of the respiratory system                                                      | 1.1985 | 0.8344 | 0.8409 | 1.7081  |
| BNFChapter 11: Diseases of the digestive system                                                        | 1.0197 | 0.9807 | 0.6987 | 1.4882  |
| BNFChapter 12: Diseases of the skin and subcutaneous tissue                                            | 1.0175 | 0.9828 | 0.6584 | 1.5724  |
| BNFChapter 13: Diseases of the musculoskeletal system/connective system                                | 0.7853 | 1.2735 | 0.5238 | 1.1773  |
| BNFChapter 14: Diseases of the genitourinary system                                                    | 1.0816 | 0.9245 | 0.745  | 1.5704  |
| BNFChapter 15: Pregnancy, childbirth and the puerperium                                                | 6.0273 | 0.1659 | 0.7936 | 45.7781 |
| BNFChapter 17: Congenital malformations, deformations and chromosomal abnormalities                    | 3.2549 | 0.3072 | 0.9928 | 10.6709 |
| BNFChapter 18: Symptoms, signs and abnormal clinical and laboratory findings, not elsewhere classified | 0.9548 | 1.0474 | 0.6656 | 1.3696  |
| BNFChapter 19: Injury/poisoning/other consequences of external causes                                  | 0.9408 | 1.0629 | 0.6469 | 1.3682  |
| BNFChapter 21: Factors influencing health and contact with health services                             | 1.2668 | 0.7894 | 0.6113 | 2.6248  |
| DMRDMR Started:strata(tgroup)tgroup=1                                                                  | 0.5974 | 1.674  | 0.5043 | 0.7076  |
| DMRNo DMR:strata(tgroup)tgroup=1                                                                       | NA     | NA     | NA     | NA      |
| DMRDMR Started:strata(tgroup)tgroup=2                                                                  | 0.9672 | 1.0339 | 0.8592 | 1.0888  |
| DMRNo DMR:strata(tgroup)tgroup=2                                                                       | NA     | NA     | NA     | NA      |
